# Supplementary material for: The Cost-Efficiency Analysis of a System for Improving Fine-Coal Combustion Efficiency of Power Plant Boilers
Source: MDPI journal article supplement (doi:10.3390/en14144295), 2021-07-16
Supplement: s1 [file s1]

Supplementary materials

# The Cost-Efficiency Analysis of a System for Improving Fine-Coal Combustion Efficiency of Power Plant Boilers

Wilhelm Jan Tic \* and Joanna Guziałowska-Tic \*

Department of Process and Environmental Engineering, Opole University of Technology,  
45-758 Opole, Poland

\* Correspondence: w.tic@po.edu.pl (W.J.T.); j.guzialowska-tic@po.edu.pl (J.G.-T.); Tel.: +48-77-449-8380

**Abstract:** Hard coal is widely used as a source of energy, and a number of catalysts have been developed to minimize the noxious impact of this fuel on combustion. This paper presents the cost-efficiency analysis of a system for improving the combustion of solid fuels, especially fine coal, in power boilers. The system is provided with a control and supervision device. It has been designed for better accuracy in controlling the boiler operating parameters, with a view to improving combustion efficiency due to the use of catalysts. The tests were carried out for system capacities ranging from 3 to 100 MW. It was found that, depending on the size of the system in the range of 3–100 MW, savings in the fuel consumption ranged from 8% to 2% due to the implementation of novel solutions in the boiler plant operation and from 6 to 2% due to the use of the combustion catalysts. Apart from boosting energy efficiency, the use of catalysts and the efficiency-boosting system resulted in the costs of overhauls being cut by about 20%. The payback time depends on system capacities, and it is between 6.75 and 1.74 years for capacities ranging from 3 to 75 MW and 2.0 years for a 100 MW plant.

**Keywords:** fine coal; combustion; market analysis; Desk Research; efficiency; refurbishment; catalysts; payback time

**Citation:** Tic, W.J.; Guziałowska-Tic, J. The Cost-Efficiency Analysis of a System for Improving Fine-Coal Combustion Efficiency of Power Plant Boilers. *Energies* **2021**, *14*, 4295. <https://doi.org/10.3390/en14144295>

Academic Editor(s): Tomislav Capuder

Received: 2 June 2021

Accepted: 12 July 2021

Published: 16 July 2021

**Publisher's Note:** MDPI stays neutral with regard to jurisdictional claims in published maps and institutional affiliations.

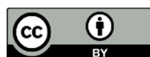

**Copyright:** © 2021 by the authors. Submitted for possible open access publication under the terms and conditions of the Creative Commons Attribution (CC BY) license (<http://creativecommons.org/licenses/by/4.0/>).

The annual volume of energy generated was calculated with Equation (S1):

$$PG = MW \cdot EM \quad (S1)$$

where:

$PG$  – energy production volume, GJ;

$MW$  – system capacity, MW;

$EM$  – amount of energy per 1 MW of power, GJ/MW.

The number of tons of hard coal combusted with the use of the catalyst was calculated with Equation (S2):

$$IW = PG / (K \cdot \frac{S}{100}) \quad (S2)$$

where:

$IW$  – annual consumption of hard coal, t;

$K$  – calorific value of hard coal, GJ/t;

$S$  – boiler efficiency, %.

Total savings in the fuel due to the use of the catalyst and due to the boiler refurbishment were calculated with Equation (S3):

$$OP = (IW - OK) \cdot MM + OK \quad (S3)$$

where:

$OP$  – total savings in the fuel, t;

$MM$  – savings in the fuel due to the refurbishment, %;

$OK$  – savings in the fuel to the catalyst, t.

The cost of the hard coal combusted in the system was calculated with Equation (S4):

$$KP = IW \cdot CW \quad (S4)$$

where:

$KP$  – annual cost of fuel, USD;

$CW$  – mean price of 1 ton of combusted hard coal, USD/t.

Savings in the fuel due to the catalyst was calculated with Equation (S5):

$$EK = OK \cdot CW \quad (S5)$$

where:

$EK$  – savings in the cost of fuel due to the catalyst, USD;

$OK$  – savings in the fuel due to the catalyst, t.

Savings in the cost of fuel due to the refurbishment were calculated with Equation (S6):

$$ES = MM \cdot CW \quad (S6)$$

where:

$ES$  – savings in the cost of fuel due to the refurbishment, USD;

$MN$  – savings in the fuel due to the refurbishment, t.

Total savings in the cost of fuel due to the system for improving fuel-combustion energy efficiency was calculated with Equation (S7):

$$EE = EK + ES \quad (S7)$$

where:

$EE$  – total economic effect due to the system for improving fuel-combustion energy efficiency, USD.

The economic effect of the introduction of the system for improving fuel-combustion energy efficiency is shared between the system vendor (30%) and user (70%).

The economic effect on the user side, after subtracting the cost of overhaul, was calculated with Equation (S8):

$$EEK = EE - (KR - OR) \quad (S8)$$

where:

$EEK$  – economic effect minus cost of overhaul, USD;

$KR$  – cost of overhaul, USD;

$OR$  – reduction of the cost of overhaul, USD.

The payback time for the costs incurred by the user of the system was calculated with Equation (S9):

$$T = \frac{PT + KI}{O - KE} \quad (S9)$$

where:

$T$  - payback time, years;

$PT$  - Cost of system purchase and implementation, USD;

$KI$  - Cost of applicators (purchase and implementation), USD;

$O$  - Customer's total savings, USD/year;

$KE$  - Annual cost of employing system operators, USD/year.
